# Supplementary material for: Cross-Sectional Survey of Antibiotic Resistance in Extended Spectrum β-Lactamase-Producing Enterobacteriaceae Isolated from Pigs in Greece
Source: MDPI journal article supplement (doi:10.3390/ani12121560), 2022-06-16
Supplement: s1 [file s1]

## Supplementary File S1: Genes detected by the CarbaResist DNA microarray-based assay

| Target gene                   | Gene function                                                                                                                                                             | Accession number |
|-------------------------------|---------------------------------------------------------------------------------------------------------------------------------------------------------------------------|------------------|
| <i>gad</i>                    | glutamate decarboxylase of <i>Escherichia coli</i>                                                                                                                        | AE014075.1       |
| <i>ihfA</i>                   | integration host factor subunit alpha                                                                                                                                     | U00096.3         |
| <i>dnaE</i>                   | DNA polymerase III subunit alpha                                                                                                                                          | U00096.3         |
| <i>basC</i>                   | acinetobactin biosynthesis protein of <i>Acinetobacter baumannii</i>                                                                                                      | AY571146.1       |
| <i>efp</i>                    | elongation factor P of <i>Acinetobacter baumannii</i>                                                                                                                     | CP001172.1       |
| <i>pld</i>                    | phospholipase D of <i>Acinetobacter baumannii</i>                                                                                                                         | CP000521.1       |
| <i>cfa</i>                    | colicin five activity protein of <i>Citrobacter freundii</i> and <i>Citrobacter braakii</i>                                                                               | U09771.1         |
| <i>ecfX</i>                   | extracytoplasmic function sigma factor of <i>Pseudomonas aeruginosa</i> [LavenirR-JocktaneD-2007]                                                                         | DQ996558.1       |
| <i>invA</i>                   | invasin A, highly specific for genus <i>Salmonella</i>                                                                                                                    | CP000026.1       |
| <i>ipaH9.8</i>                | invasion plasmid antigen                                                                                                                                                  | AF047365.1       |
| <i>khe</i>                    | klebsolysin of <i>Klebsiella pneumoniae</i>                                                                                                                               | AF293352.1       |
| <i>lacY</i>                   | lactose permease; the <i>lacY</i> gene is missing in all <i>Shigella</i> spp.                                                                                             | U00096.2         |
| <i>rrs</i>                    | 16S rRNA                                                                                                                                                                  | U00096.3         |
| <i>blaBIC</i>                 | carbapenemase, class A beta-lactamase                                                                                                                                     | GQ260093.1       |
| <i>blaDIM</i>                 | carbapenemase, class B metallo beta-lactamase                                                                                                                             | KC004136.2       |
| <i>blaGES</i>                 | carbapenemase, class A beta-lactamase                                                                                                                                     | AY219651.1       |
| <i>blaGIM</i>                 | carbapenemase, class B metallo beta-lactamase                                                                                                                             | consensus        |
| <i>blaGOB</i>                 | carbapenemase, class B metallo beta-lactamase                                                                                                                             | consensus        |
| <i>blaIMI-3 (NmCA)</i>        | carbapenemase, class A beta-lactamase associated with imipenem resistance                                                                                                 | AY780889.1       |
| <i>blaIMI-R</i>               | regulator of <i>blaIMI-3</i> (NMC-A)                                                                                                                                      | Z21956.1         |
| <i>blaIMP</i>                 | carbapenemase, class B metallo beta-lactamase                                                                                                                             | consensus        |
| <i>blaIMP25 (blaSIM-1)</i>    | carbapenemase, class B metallo beta-lactamase (synonym: <i>blaSIM</i> )                                                                                                   | EU686387.1       |
| <i>blaIMP35</i>               | carbapenemase, class B metallo beta-lactamase                                                                                                                             | JQ432564.1       |
| <i>blaIND</i>                 | carbapenemase, class B metallo beta-lactamase of <i>Chryseobacterium</i>                                                                                                  | consensus        |
| <i>blaKHM</i>                 | carbapenemase, class B metallo beta-lactamase                                                                                                                             | consensus        |
| <i>blaKPC</i>                 | carbapenemase, class A serin beta-lactamase                                                                                                                               | consensus        |
| <i>blaNDM</i>                 | carbapenemase, class B metallo beta-lactamase (New Delhi metallo beta-lactamase)                                                                                          | consensus        |
| <i>blaPAM-1</i>               | carbapenemase, subclass B3 metallo beta-lactamase ( <i>Pseudomonas alcaligenes</i> metallo-beta-lactamase)                                                                | AB858498.1       |
| <i>blaSFH-1</i>               | carbapenemase, class B metallo beta-lactamase                                                                                                                             | AF197943.1       |
| <i>blaSMB-1</i>               | carbapenemase, class B metallo beta-lactamase                                                                                                                             | AB636283.1       |
| <i>blaSME</i>                 | carbapenemase, class A beta-lactamase                                                                                                                                     | consensus        |
| <i>blaSPM-1</i>               | carbapenemase, class B metallo beta-lactamase                                                                                                                             | AY341249.1       |
| <i>blaVIM</i>                 | carbapenemase, class B metallo beta-lactamase                                                                                                                             | consensus        |
| <i>blaVIM-2</i>               | carbapenemase, class B metallo beta-lactamase                                                                                                                             | AF191564.1       |
| <i>blaVIM-7</i>               | carbapenemase, class B metallo beta-lactamase                                                                                                                             | AJ536835.1       |
| <i>blaOXA-23-like</i>         | carbapenemase, class D beta-lactamase                                                                                                                                     | AJ132105.1       |
| <i>blaOXA-40-like</i>         | carbapenemase, class D beta-lactamase                                                                                                                                     | AF509241.1       |
| <i>blaOXA-48-like</i>         | carbapenemase, class D beta-lactamase                                                                                                                                     | AY236073.2       |
| <i>blaOXA-51-like</i>         | carbapenemase, class D beta-lactamase                                                                                                                                     | CP000863.1       |
| ISAbA1 to <i>blaOXA-51</i>    | Insertion sequence AbA1 is adjacent to <i>blaOXA-51</i> -like gene. This combination mediated carbapenem resistant in <i>Acinetobacter baumannii</i> isolates             | CP001921.1       |
| no ISAbA1 to <i>blaOXA-51</i> | Insertion sequence AbA1 is not adjacent to <i>blaOXA-51</i> -like gene. This combination does not mediate carbapenem resistant in <i>Acinetobacter baumannii</i> isolates | CU459141.1       |
| <i>blaOXA-54</i>              | carbapenemase, class D beta-lactamase                                                                                                                                     | AY500137.1       |
| <i>blaOXA-55</i>              | carbapenemase, class D beta-lactamase                                                                                                                                     | AY343493.1       |
| <i>blaOXA-58</i>              | carbapenemase, class D beta-lactamase                                                                                                                                     | AY665723.1       |
| <i>blaOXA-134/235/284</i>     | carbapenemase <i>blaOXA-134</i> or -235 or -284, class D beta-lactamase                                                                                                   | AYH001000005.1   |

| Target gene                   | Gene function                                                                                                                           | Accession number        |
|-------------------------------|-----------------------------------------------------------------------------------------------------------------------------------------|-------------------------|
| <i>blaOXA-143/182/253/255</i> | carbapenemase <i>blaOXA-40</i> -like, class D beta-lactamase                                                                            | GQ861437.1              |
| <i>blaOXA-181/232</i>         | carbapenemase <i>blaOXA-48</i> -like, class D beta-lactamase                                                                            | CP000469.1              |
| <i>blaOXA-214</i>             | carbapenemase, class D beta-lactamase                                                                                                   | JN861783.1              |
| <i>blaOXA-279</i>             | carbapenemase, class D beta-lactamase                                                                                                   | APOK01000044.1          |
| <i>blaOXA-292</i>             | carbapenemase, class D beta-lactamase                                                                                                   | APRH01000012.1          |
| <i>blaCME</i>                 | extended spectrum beta-lactamase, class A                                                                                               | AF033200.1              |
| <i>blaCTX-M1/15</i>           | extended spectrum beta-lactamase, class A                                                                                               | X92506.1,<br>HQ202266.1 |
| <i>blaCTX-M2</i>              | extended spectrum beta-lactamase, class A                                                                                               | AF286192.1              |
| <i>blaCTX-M8</i>              | extended spectrum beta-lactamase, class A                                                                                               | AY750914.2              |
| <i>blaCTX-M9</i>              | extended spectrum beta-lactamase, class A                                                                                               | FQ482074.1              |
| <i>blaMOX-CMY9</i>            | extended-spectrum beta-lactamase precursor, class C                                                                                     | AF381617.1              |
| <i>blaPER-1</i>               | extended-spectrum beta-lactamase, class A beta-lactamase PER-1                                                                          | Z21957.1                |
| <i>blaPER-2</i>               | extended-spectrum beta-lactamase, class A beta-lactamase PER-2                                                                          | X93314.1                |
| <i>blaSHV</i>                 | class A beta-lactamase - consensus sequence for <i>blaSHV</i> genes, including extended-spectrum beta-lactamases                        | consensus               |
| <i>blaTEM</i>                 | class A beta-lactamase - consensus sequence for <i>blaTEM</i> genes, including extended-spectrum beta-lactamases                        | consensus               |
| <i>blaVEB</i>                 | extended-spectrum beta-lactamase, class A                                                                                               | consensus               |
| <i>blaOXA-18</i>              | extended spectrum beta-lactamase, class D                                                                                               | EU503121.1              |
| <i>blaOXA-45</i>              | extended spectrum beta-lactamase, class D                                                                                               | AJ519683.1              |
| <i>blaOXA-1</i>               | narrow spectrum beta-lactamase, class D                                                                                                 | AY458016.1              |
| <i>blaOXA-9</i>               | narrow spectrum beta-lactamase, class D                                                                                                 | M55547.1                |
| <i>blaOXA-2</i>               | consensus probe for extended and narrow spectrum class D beta-lactamases belonging to group <i>blaOXA-2</i>                             | consensus               |
| <i>blaOXA-10</i>              | consensus probe for extended and narrow spectrum class D beta-lactamases belonging to group <i>blaOXA-10</i>                            | consensus               |
| <i>blaOXA-60</i>              | narrow spectrum beta-lactamase, class D                                                                                                 | AF525303.2              |
| <i>blaMIR</i>                 | extended spectrum beta-lactamase, class C beta-lactamase                                                                                | M37839.2                |
| <i>blaACC</i>                 | AmpC beta-lactamase                                                                                                                     | EF554600.1              |
| <i>blaACT</i>                 | AmpC beta-lactamase                                                                                                                     | U58495.2                |
| <i>blaCMY</i>                 | AmpC beta-lactamase, consensus sequence                                                                                                 | consensus               |
| <i>blaDHA</i>                 | AmpC beta-lactamase                                                                                                                     | EF406115.1              |
| <i>blaFOX</i>                 | AmpC beta-lactamase                                                                                                                     | consensus               |
| <i>blaMOX</i>                 | AmpC beta-lactamase                                                                                                                     | consensus               |
| <i>aac(3')</i>                | 3-N-aminoglycoside acetyltransferase; associated with resistance to astromycin; gentamicin; sisomicin                                   | consensus               |
| <i>aac(3')-Ia</i>             | 3-N-aminoglycoside acetyltransferase; associated with resistance to astromycin; gentamicin; sisomicin                                   | U90945.1                |
| <i>aac(3')-Ib</i>             | 3-N-aminoglycoside acetyltransferase; associated with resistance to astromycin; gentamicin; sisomicin                                   | KJ679408.1              |
| <i>aac(3')-Ic</i>             | 3-N-aminoglycoside acetyltransferase; associated with resistance to astromycin; gentamicin; sisomicin                                   | AJ511268.1              |
| <i>aac(3')-Ie</i>             | 3-N-aminoglycoside acetyltransferase; associated with resistance to astromycin; gentamicin; sisomicin                                   | AY458224.1              |
| <i>aac(3')-IVa</i>            | 3-N-aminoglycoside acetyltransferase; associated with resistance to apramycin; dibekacin; gentamicin; netilmicin; sisomicin; tobramycin | EU784152.1              |
| <i>aac(6')</i>                | aminoglycoside 6'-N-acetyltransferase, associated with resistance to amikacin; dibekacin; isepamicin; netilmicin; sisomicin; tobramycin | consensus               |
| <i>aac(6')-31</i>             | aminoglycoside 6'-N-acetyltransferase; associated with resistance to streptomycin, spectinomycin                                        | AJ640197.1              |
| <i>aac(6')-Ib</i>             | aminoglycoside 6'-N-acetyltransferase; associated with resistance to streptomycin, spectinomycin                                        | M21682.1                |
| <i>aac(6')-II</i>             | aminoglycoside 6'-N-acetyltransferase; associated with resistance to streptomycin, spectinomycin                                        | EF127959.1              |
| <i>aac(6')-IIa</i>            | aminoglycoside 6'-N-acetyltransferase; associated with resistance to streptomycin, spectinomycin                                        | EU912537.1              |
| <i>aac(6')-IIc</i>            | aminoglycoside 6'-N-acetyltransferase; associated with resistance to streptomycin, spectinomycin                                        | EU855788.1              |
| <i>aac-aph</i>                | 6'-aminoglycoside-N-acetyltransferase/2"-aminoglycoside phosphotransferase; associated with resistance to gentamycin                    | AE017171.1              |
| <i>aadA1</i>                  | aminoglycoside adenyltransferase; associated with resistance to streptomycin, spectinomycin                                             | EU704128.1              |
| <i>aadA2</i>                  | aminoglycoside adenyltransferase; associated with resistance to streptomycin, spectinomycin                                             | EU704128.1              |
| <i>aadA4</i>                  | aminoglycoside adenyltransferase; associated with resistance to streptomycin, spectinomycin                                             | Z50802.3                |
| <i>aadB</i>                   | 2"-aminoglycoside nucleotidyltransferase                                                                                                | L06418.4                |
| <i>ant2</i>                   | aminoglycoside (2") adenyltransferase; associated with resistance to dibekacin; gentamicin; kanamycin; sisomicin; tobramycin            | L06418.4                |

| Target gene          | Gene function                                                                                                          | Accession number          |
|----------------------|------------------------------------------------------------------------------------------------------------------------|---------------------------|
| <i>aphA</i>          | aminoglycoside 3'-phosphotransferase; kanamycin resistance protein                                                     | AY260546.3                |
| <i>armA</i>          | 16S rRNA methylase, associated with aminoglycoside resistance                                                          | AB117519.1                |
| <i>grm</i>           | 16S rRNA methylase, associated with gentamicin resistance                                                              | M55521.1                  |
| <i>npmA</i>          | 16S rRNA methylase, associated with aminoglycoside resistance                                                          | AB261016.1                |
| <i>rmtA</i>          | 16S rRNA methylase, associated with aminoglycoside resistance                                                          | AB083212.2                |
| <i>rmtB</i>          | 16S rRNA methylase, associated with aminoglycoside resistance                                                          | DQ345788.1                |
| <i>rmtC</i>          | 16S rRNA methylase, associated with aminoglycoside resistance                                                          | AB194779.2                |
| <i>rmtD</i>          | 16S rRNA methylase, associated with aminoglycoside resistance                                                          | DQ914960.2                |
| <i>mph</i>           | macrolide 2'-phosphotransferase                                                                                        | consensus                 |
| <i>mrx</i>           | member of macrolide inactivation gene cluster <i>mphA</i> – <i>mrx</i> - <i>mphR</i>                                   | consensus                 |
| <i>qepA</i>          | QepA - fluoroquinolone/quinolone efflux pump                                                                           | AM886293.1                |
| <i>qnrA1</i>         | quinolone or fluoroquinolone resistance protein                                                                        | AY931018.1                |
| <i>qnrB</i>          | quinolone or fluoroquinolone resistance protein                                                                        | AB281054.1                |
| <i>qnrC</i>          | quinolone or fluoroquinolone resistance protein                                                                        | EU917444.1                |
| <i>qnrD</i>          | quinolone or fluoroquinolone resistance protein                                                                        | FJ228229.1                |
| <i>qnrS</i>          | quinolone or fluoroquinolone resistance protein                                                                        | AM234722.1                |
| <i>sul1</i>          | dihydropteroate synthetase type 1                                                                                      | AJ698325.1                |
| <i>sul2</i>          | dihydropteroate synthetase type 2                                                                                      | DQ464881.1                |
| <i>sul3</i>          | dihydropteroate synthetase type 3                                                                                      | AJ459418.2                |
| <i>dfrA1</i>         | dihydrofolate reductase type 1                                                                                         | AJ884723.1                |
| <i>dfrA5</i>         | dihydrofolate reductase type 5                                                                                         | AB188269.1                |
| <i>dfrA7</i>         | dihydrofolate reductase type 7                                                                                         | AB161450.1,<br>AM237806.1 |
| <i>dfrA12</i>        | dihydrofolate reductase type 12                                                                                        | AB154407.1                |
| <i>dfrA13</i>        | dihydrofolate reductase type 13 (synonym A21)                                                                          | Z50802.3                  |
| <i>dfrA14</i>        | dihydrofolate reductase type 14                                                                                        | AJ313522.1                |
| <i>dfrA15</i>        | dihydrofolate reductase type 15                                                                                        | Z83311.1                  |
| <i>dfrA17</i>        | dihydrofolate reductase type 17                                                                                        | AF169041.1                |
| <i>dfrA19</i>        | dihydrofolate reductase type 19                                                                                        | AJ310778.1                |
| <i>intI1</i>         | class 1 integron integrase                                                                                             | AY260546.3                |
| <i>intI2</i>         | class 2 integron integrase                                                                                             | AY183453.1                |
| <i>intI3</i>         | class 3 integron integrase                                                                                             | EF469602.1                |
| <i>tnpISEcp1</i>     | transposase for the transposon ISEcp1                                                                                  | AB543698.1                |
| <i>oqxA</i>          | OqxA - membran fusion protein, component of RND-type multidrug efflux pump, associated with olaquinox resistance       | EU370913.1                |
| <i>oqxB</i>          | OqxB - integral membrane protein, component of RND-type multidrug efflux pump, associated with olaquinox resistance    | EU370913.1                |
| <i>higA</i>          | higA is the antitoxin of the translation-dependent mRNA interferase toxin higB                                         | U43847.1                  |
| <i>higB</i>          | Ectopic expression of higB causes inhibition of cell growth which is alleviated by co-expression of higA               | U43847.1                  |
| <i>splA</i>          | splA is the antitoxin of the translation-dependent mRNA interferase toxin splT                                         | EU294228.1                |
| <i>splT</i>          | Ectopic expression of splT causes inhibition of cell growth which is alleviated by co-expression of splA               | EU294228.1                |
| <i>mcr-1 / mcr-2</i> | mcr-1 and mcr-2, phosphoethanolamine transferase associated with resistance to colistin and polymyxin-type antibiotics | KP347127.1                |
| <i>mcr-3</i>         | mcr-3, phosphoethanolamine transferase associated with resistance to colistin and polymyxin-type antibiotics           | KY924928.1                |
| <i>mcr-4</i>         | mcr-4, phosphoethanolamine transferase associated with resistance to colistin and polymyxin-type antibiotics           | MF543359.1.1              |
| <i>mcr-5</i>         | mcr-5, phosphoethanolamine transferase associated with resistance to colistin and polymyxin-type antibiotics           | NG_055658.1               |
| <i>mcr-6</i>         | mcr-6, phosphoethanolamine transferase associated with resistance to colistin and polymyxin-type antibiotics           | NG_055781.1               |
| <i>mcr-7</i>         | mcr-7, phosphoethanolamine transferase associated with resistance to colistin and polymyxin-type antibiotics           | NG_056413.1               |
| <i>mcr-8</i>         | mcr-8, phosphoethanolamine transferase associated with resistance to colistin and polymyxin-type antibiotics           | NG_061399.1               |
| <i>mcr-9</i>         | mcr-9, phosphoethanolamine transferase associated with resistance to colistin and polymyxin-type antibiotics           | MK070339.1                |
